# Supplementary material for: Strong induction of iodothyronine deiodinases by chemotherapeutic selenocompounds
Source: Royal Society of Chemistry journal article supplement (doi:10.1039/c4mt00273c), 2015-01-01
Supplement: c4mt00273c1.pdf [file c4mt00273c1.pdf]

## Supplementary Table

Table S1: Overview of Oligonucleotides used in the qRT-PCR analyses:

| Gene | Fwd 5' -> 3'           | Rev 5' -> 3'           |
|------|------------------------|------------------------|
| HPRT | AATTCTTTGCTGACCTGCTG   | TACTGCCTGACCAAGGAAAG   |
| DIO1 | GGTGCAACATTTGGGAGTTTAT | TGGTGATTTCTGATGTCCATGT |
| DIO2 | CTATGACTCGGTCATTCTGCTC | CTTCTGTACTGGAGACATGCAC |
| DIO3 | GCTTCCAGAGCCAGCACATC   | GCTGCCGAAATTGAGAACCA   |

## Supplementary Figure

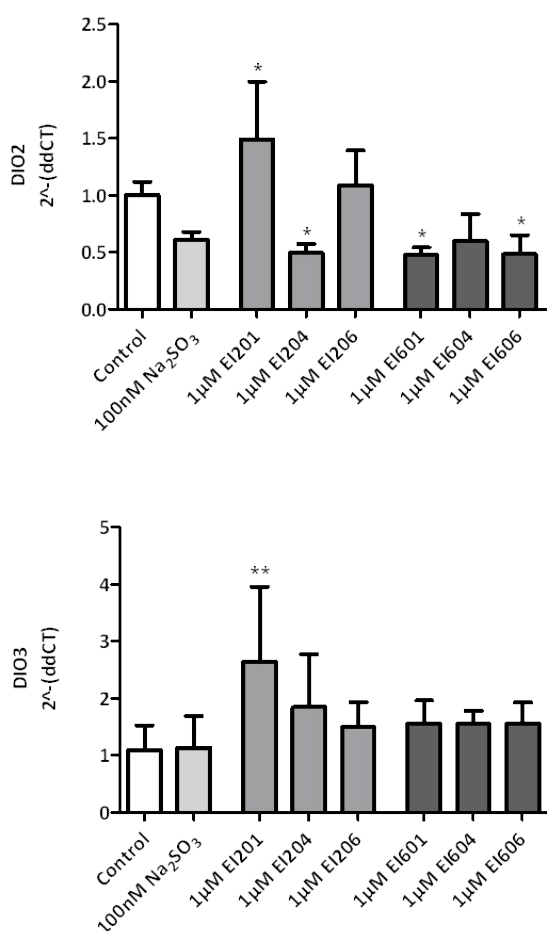

**Figure S1** Compound-specific effects of imidoselenocarbamates on DIO2 and DIO3 transcript concentrations in stably transfected HEK293 cells. qRT-PCR analyses indicate moderate effects of EI201, EI204, EI601 and EI606 on the mRNA steady state levels of DIO2, in contrast to the strong inducing effects of these substances on the protein expression (top). The qRT-PCR analyses with HEK293 cells stably expressing DIO3 indicates no significant effects on DIO3 mRNA concentrations with the exception of EI201. The imidoselenocarbamates were applied at a f. c. of 1 μM for 48 h. Data represent mean + SD; n=3.
